# Supplementary material
Source: Elsevier journal article supplement (https://www.sciencedirect.com/science/article/pii/S0301054618301356)
Supplement: mmc1 [file S0301054618301356:mmc1.pdf]

## PedMIDAS

### Headache Disability.

The following questions try to assess how much the headaches are affecting day-to-day activity. Your answers should be based on the last three months. There are no “right” or “wrong” answers so please put down your best guess.

1. How many full school days of school were missed in the last 3 \_\_\_\_\_  
months due to headaches?

2. How many partial days of school were missed in the last 3 months  
due to headaches (do not include full days counted in the \_\_\_\_\_  
first question)?

3. How many days in the last 3 months did you function at less than  
half your ability in school because of a headache (do not  
include days counted in the first two questions)? \_\_\_\_\_

4. How many days were you not able to do things at home (i.e.,  
chores, homework, etc.) due to a headache? \_\_\_\_\_

5. How many days did you not participate in other activities due to  
headaches (i.e., play, go out, sports, etc.)? \_\_\_\_\_

6. How many days did you participate in these activities, but  
functioned at less than half your ability (do not include \_\_\_\_\_  
days counted in the 5th question)?

**Total PedMIDAS Score** \_\_\_\_\_

**Headache Frequency** \_\_\_\_\_

**Headache Severity** \_\_\_\_\_
